# Supplementary material for: Responsive surface bioaffinity binding to construct flexible and sensitive electrochemical aptasensors
Source: Royal Society of Chemistry journal article supplement (doi:10.1039/c8an02313a), 2019-01-01
Supplement: c8an02313a1.pdf [file c8an02313a1.pdf]

Supporting information

**Responsive surface bioaffinity binding to construct flexible and sensitive electrochemical aptasensor**

Ying Liu, Zhencai Zhu, Chao Wang, Rui Gao, Xiaoyan Yang, and Shufeng Liu\*

†Key Laboratory of Optic-electric Sensing and Analytical Chemistry for Life Science, Ministry of Education, College of Chemistry and Molecular Engineering, Qingdao University of Science and Technology, No. 53, Rd. Zhengzhou, Qingdao 266042, China.

\* Corresponding author. E-mail: [sliu@qust.edu.cn](mailto:sliu@qust.edu.cn).

**Table of contents**

|                         |           |
|-------------------------|-----------|
| <b>Table S1</b> -----   | <b>S2</b> |
| <b>Figure S1</b> -----  | <b>S3</b> |
| <b>Figure S2</b> -----  | <b>S4</b> |
| <b>Figure S3</b> -----  | <b>S5</b> |
| <b>Table S2</b> -----   | <b>S6</b> |
| <b>Table S3</b> -----   | <b>S7</b> |
| <b>Table S4</b> -----   | <b>S8</b> |
| <b>References</b> ----- | <b>S9</b> |

**Table S1.** The used nucleic acid base sequences in the experiment<sup>a</sup>

| Name              | Sequence (5' to 3')                                                               |
|-------------------|-----------------------------------------------------------------------------------|
| IP (for ATP)      | Dig- <u>CAATACTCCCCCAGGTTTTT</u> -(CH <sub>2</sub> ) <sub>6</sub> -SH             |
| HP-1 (for ATP)    | <b><u>ACCTGGGGGAGTATTGCGGAGG</u></b> (AAGGT)<br><i>CCTCCG</i>                     |
| HP-2 (for ATP)    | <b><u>ACCTGGGGGAGTATTGCGGAGG</u></b> (AAGGT<br>TTTAA) <i>CCTCCG</i>               |
| HP-3 (for ATP)    | <b><u>ACCTGGGGGAGTATTGCGGAGG</u></b> (AAGGT<br>TTTTTTTTAA) <i>CCTCCG</i>          |
| HP-4 (for ATP)    | <b><u>ACCTGGGGGAGTATTGCGGAGG</u></b> (AAGGT<br>TTTTTTTTTTTTTAA) <i>CCTCCG</i>     |
| HP-5 (for ATP)    | <b><u>ACCTGGGGGAGTATTGCGGAGG</u></b> (AAGGT<br>TTTTTTTTTTTTTTTTTAA) <i>CCTCCG</i> |
| IP (for thrombin) | Dig- <u>TGCCCTACCACGGACTTTTT</u> -SH                                              |
| HP (for thrombin) | <b><u>AGTCCGTGGTAGGGCAGGTTGG</u></b> (GGTGA<br>CTTTTTTTTTTTTTT) <i>CCAACC</i>     |

<sup>a</sup> The HP-1 to HP-5 represent the hairpin-like aptamer probes with different loop sequences shown in the bracket. They are 5, 10, 15, 20 and 25-base loop sequences for HP-1, HP-2, HP-3, HP-4 and HP-5, respectively. The aptamer sequences were shown in bold letters. The underlined letters in IP and HP indicates mutual base complementarities. The italic letters in HP shows the complementary bases in the stem region. The ATP aptamer sequence was based on the reference (D. E. Huizenga and J. W. Szostak, *Biochemistry*, 1995, 34, 656; wherein the ATP aptamer sequence was firstly developed). The 29-mer DNA aptamer for thrombin was based on the reference (D. M. Tasset, M. F. Kubik and W. Steiner, *J. Mol. Biol.*, 1997, 272, 688; wherein this aptamer sequence was originally developed).

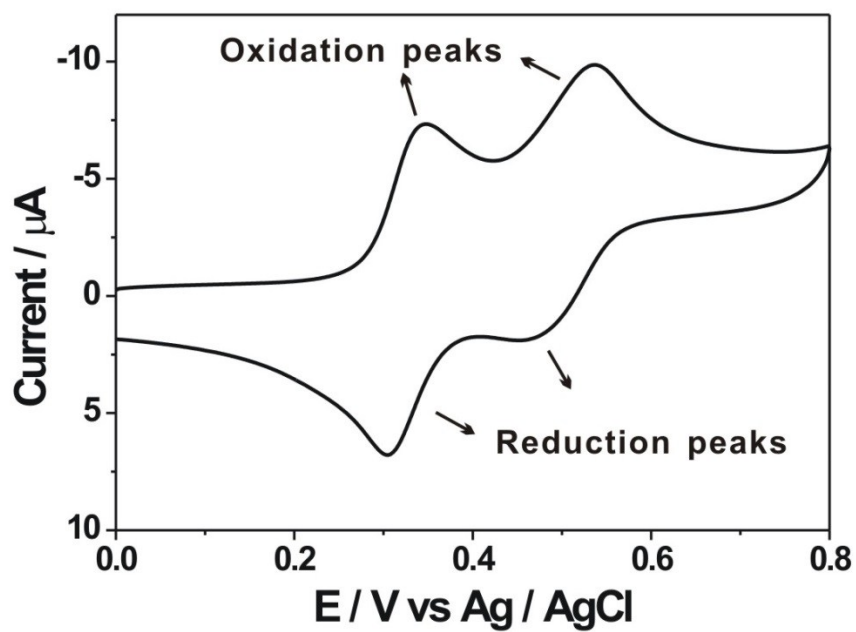

**Figure S1.** Cyclic voltammogram of bare gold electrode in 0.1 M pH 5.5 HAc-NaAc buffer containing 1 mM TMB and 5 mM  $\text{H}_2\text{O}_2$ . The scan potential and scan rate were 0-0.8 V and 100 mV/s, respectively.

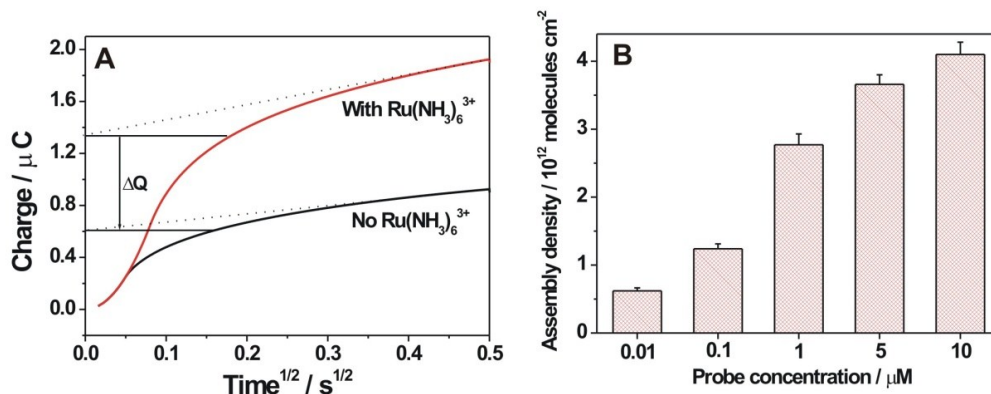

**Figure S2.** (A) Chronocoulometric curves of duplex DNA probe modified electrodes in the absence and presence of 50  $\mu\text{M}$   $\text{Ru}(\text{NH}_3)_6^{3+}$ . (B) Surface assembly density of duplex DNA probe obtained by using different concentration of duplex DNA probe.

The corresponding calculation method for the surface coverage of duplex DNA probe on the electrode was based on the previous reference (A. B. Steel, T. M. Herne and M. J. Tarlov, *Anal. Chem.*, 1998, **70**, 4670) and shown below:

The charge  $Q$ , as a function of time  $t$  in a chronocoulometric experiment is given by the integrated Cottrell expression,

$$Q(t) = 2FAC\left(\frac{Dt}{\pi}\right)^{\frac{1}{2}} + Q_c + nFA\Gamma_0$$

where  $F$  is the Faraday constant (96487 C/equiv),  $n$  is the number of electrons involved in the electrode reaction,  $A$  is the electrode area ( $\text{cm}^2$ ),  $C$  is the bulk concentration of  $\text{Ru}(\text{NH}_3)_6^{3+}$  ( $\text{mol cm}^{-3}$ ),  $D$  is its diffusion coefficient ( $\text{cm}^2 \text{s}^{-1}$ ),  $t$  is the time (s),  $Q_c$  is the capacitive charge (C), and  $\Gamma_0$  is the quantity of the adsorbed  $\text{Ru}(\text{NH}_3)_6^{3+}$  ( $\text{mol cm}^{-2}$ ). The term  $\Gamma_0$  designates the surface excess and represents the amount of  $\text{Ru}(\text{NH}_3)_6^{3+}$  confined near the electrode surface. The chronocoulometric intercept at  $t=0$  is then the sum of the capacitive charge and the surface excess terms. The surface excess is thus determined from the difference ( $\Delta Q$ ) in chronocoulometric intercepts for the identical potential step experiment in the presence and absence of  $\text{Ru}(\text{NH}_3)_6^{3+}$ .

The saturated surface excess of  $\text{Ru}(\text{NH}_3)_6^{3+}$  is then converted to the surface density of the duplex DNA probe with the relationship,

$$\Gamma_{DNA} = \Gamma_0 \left(\frac{z}{m}\right) (N_A)$$

Where  $\Gamma_{DNA}$  is the surface density of the duplex DNA probe ( $\text{molecules/cm}^2$ ),  $m$  is the number of bases in the duplex DNA probe,  $z$  is the charge of the  $\text{Ru}(\text{NH}_3)_6^{3+}$ , and  $N_A$  is Avogadro's number.

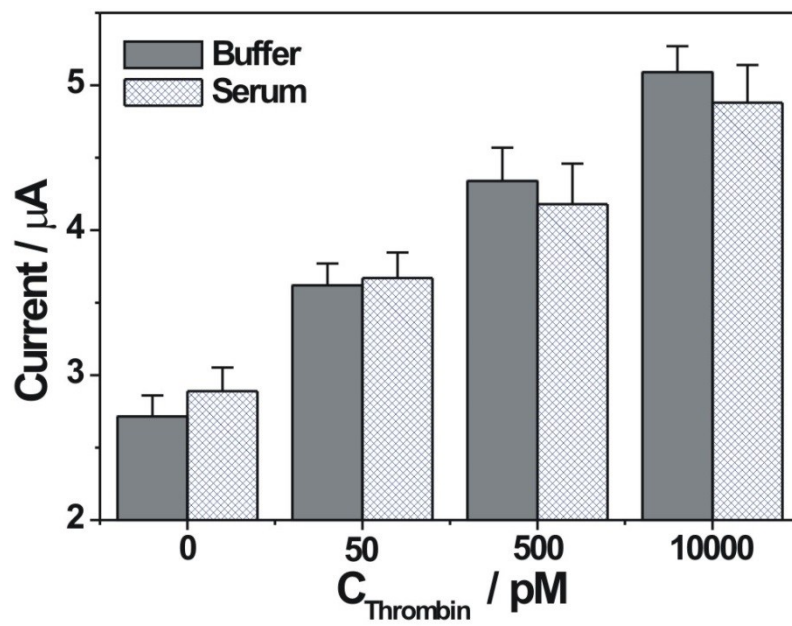

**Figure S3.** Steady current responses toward the spiked thrombin in buffer and 5% diluted serum.

**Table S2.** The detection performance comparison toward ATP by electrochemical aptamer-based methods<sup>a</sup>

| Method | Detection limit | Dynamic range       | Strategy                                                               | Ref.      |
|--------|-----------------|---------------------|------------------------------------------------------------------------|-----------|
| SWV    | 1.9 nM          | 10 nM ~ 100 $\mu$ M | Coupling signal-on and signal-off strategy                             | 1         |
| SWV    | 1.4 nM          | 5 nM ~ 1 $\mu$ M    | Target-induced conformational change of dual-hairpin DNA structure     | 2         |
| SWV    | 10 nM           | 10 nM ~ 1 mM        | Target-responsive aptamer switch                                       | 3         |
| CC     | 100 nM          | 100 nM ~ 1 mM       | Surface charge change                                                  | 4         |
| DPV    | 10 nM           | 10 ~ 80 nM          | Aptamer-complementary DNA oligonucleotides as probe                    | 5         |
| SWV    | 3.4 nM          | 10 nM ~ 1 $\mu$ M   | Nicking endonuclease-assisted recycling of target–aptamer complex      | 6         |
| CC     | 0.2 nM          | 1 nM ~ 10 $\mu$ M   | Gold nanoparticle-based signal amplification                           | 7         |
| SWV    | 5 nM            | 10 nM ~ 4 mM        | nanoprobe-enhanced split aptamer-based electrochemical sandwich assays | 8         |
| EIS    | 15 nM           | 15 nM ~ 4mM         | Graphene enhanced electron transfer                                    | 9         |
| CA     | 0.87 nM         | 1 nM ~ 10 $\mu$ M   | Responsive surface bioaffinity binding strategy                        | This work |

<sup>a</sup>Abbreviation: square wave voltammogram (SWV), differential pulse voltammetry (DPV), chronocoulometry (CC), electrochemical impedance spectroscopy (EIS), chronoamperometry (CA).

**Table S3.** Detection performances of current electrochemical aptasensors toward ATP and thrombin

| Target   | Linear equation                                                          | Linear range          | Detection limit | Correlation coefficient |
|----------|--------------------------------------------------------------------------|-----------------------|-----------------|-------------------------|
| ATP      | $I (\mu\text{A}) = 9.428 + 0.712 \log C_{\text{ATP}} (\text{M})$         | 1 nM-10 $\mu\text{M}$ | 0.87 nM         | 0.9948                  |
| Thrombin | $I (\mu\text{A}) = 10.0017 + 0.6103 \log C_{\text{thrombin}} (\text{M})$ | 10 pM-100 nM          | 6.3 pM          | 0.9931                  |

**Table S4.** The detection performance comparison toward thrombin by electrochemical aptamer-based methods <sup>a</sup>

| Method | Detection limit | Dynamic range    | Strategy                                                | Ref.      |
|--------|-----------------|------------------|---------------------------------------------------------|-----------|
| SWV    | 6.4 nM          | 20 ~ 768 nM      | Binding-induced conformational change                   | 10        |
| LSV    | 1 nM            | None             | Nucleic acid-functionalized Pt nanoparticles            | 11        |
| SWV    | 1.7 pM          | 5 pM ~ 1 nM      | Proximity binding-triggered molecular machine           | 12        |
| DPV    | 0.1 nM          | 1 ~ 200 nM       | Enzyme amplification                                    | 13        |
| EIS    | 0.267 pM        | 0.267 ~267 pM    | Molybdenum disulphide nanosheets                        | 14        |
| ACV    | 2.5 pM          | 10 pM~100 nM     | Binding-induced DNA walker                              | 15        |
| SWV    | 1.2 pM          | 10 pM~10 $\mu$ M | Gold nanoparticle-decorated MoS <sub>2</sub> nanosheets | 16        |
| EIS    | 10 pM           | 0.3 ~50 nM       | Functionalized graphene nanocomposites                  | 17        |
| CA     | 6.3 pM          | 10 pM~100 nM     | Responsive surface bioaffinity binding strategy         | This work |

<sup>a</sup>Abbreviation: square wave voltammogram (SWV), linear sweep voltammogram (LSV), differential pulse voltammetry (DPV), electrochemical impedance spectroscopy (EIS), alternating current voltammetry (ACV), chronoamperometry (CA).



## References

- [1] L. Wu, X. Zhang, W. Liu, E. Xiong and J. Chen, *Anal. Chem.*, 2013, **85**, 8397.
- [2] J. Jia, J. Feng, G. H. Chen, H. Q. Luo and N. B. Li, *Sensors and Actuators B*, 2016, **222**, 1090.
- [3] X. Zuo, S. Song, J. Zhang, D. Pan, L. Wang and C. Fan, *J. Am. Chem. Soc.*, 2007, **129**, 1042.
- [4] L. Shen, Z. Chen, Y. Li, P. Jing, S. Xie, S. He, P. He and Y. Shao, *Chem. Commun.*, 2007, 2169.
- [5] Y. Lu, X. Li, L. Zhang, P. Yu, L. Su and L. Mao, *Anal. Chem.*, 2008, **80**, 1883.
- [6] T. Hu, W. Wen, X. Zhang and S. Wang, *Analyst*, 2016, **141**, 1506.
- [7] W. Li, Z. Nie, X. Xu, Q. Shen, C. Deng, J. Chen and S. Yao, *Talanta*, 2009, **78**, 954.
- [8] T. Zhao, R. Liu, X. Ding, J. Zhao, H. Yu, L. Wang, Q. Xu, X. Wang, X. Lou, M. He and Y. Xiao, *Anal. Chem.*, 2015, **87**, 7712.
- [9] L. Wang, M. Xu, L. Han, M. Zhou, C. Zhu and S. Dong, *Anal. Chem.*, 2012, **84**, 7301.
- [10] Y. Xiao, A. A. Lubin, A. J. Heeger and K. W. Plaxco, *Angew. Chem. Int. Ed.*, 2005, **44**, 5456.
- [11] R. Polsky, R. Gill, L. Kaganovsky and I. Willner, *Anal. Chem.*, 2006, **78**, 2268.
- [12] J. Yang, B. Dou, R. Yuan and Y. Xiang, *Anal. Chem.*, 2017, **89**, 5138.
- [13] B. Jiang, M. Wang, C. Li and J. Xie, *Biosens. Bioelectron.*, 2013, **43**, 289.
- [14] K. C. Lin, B. Jagannath, S. Muthukumar and S. Prasad, *Analyst*, 2017, **142**, 2770.
- [15] Y. Ji, L. Zhang, L. Zhu, J. Lei, J. Wu and H. Ju, *Biosens. Bioelectron.*, 2017, **96**, 201.
- [16] S. Su, H. Sun, W. Cao, J. Chao, H. Peng, X. Zuo, L. Yuwen, C. Fan and L. Wang, *ACS Appl. Mater. Interfaces*, 2016, **8**, 6826.
- [17] Q. Wang, Z. Zhou, Y. Zhai, L. Zhang, W. Hong, Z. Zhang and S. Dong, *Talanta*, 2015, **141**, 247.
